# Supplementary material
Source: MDPI journal article supplement (https://www.mdpi.com/2073-4344/13/4/661)
Supplement: s1 [file s1]

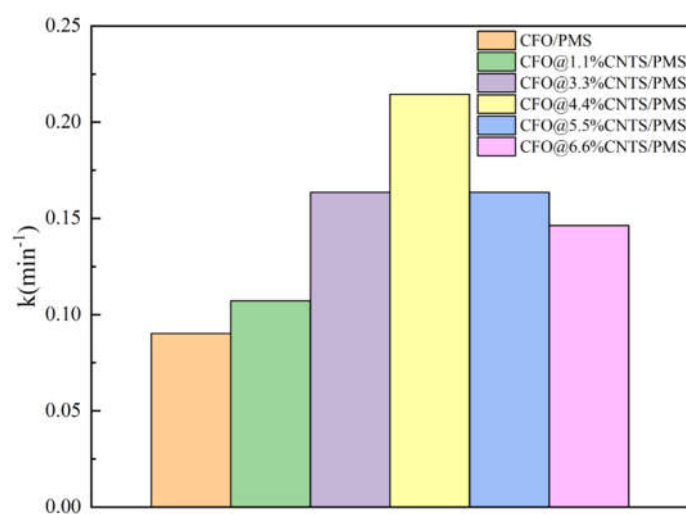

**Figure S1.**  $K_{obs}$  of CQP degradation in different systems. (Experiment conditions:  $[[\text{CQP}]_0 = 10 \text{ mg/L}$ ,  $[\text{catalyst}] = 35 \text{ mg/L}$ ,  $[\text{PMS}] = 2.0 \text{ mM}$ , initial  $\text{pH} = 6.5 \pm 0.3$ ,  $T = 25^\circ\text{C}$ ).

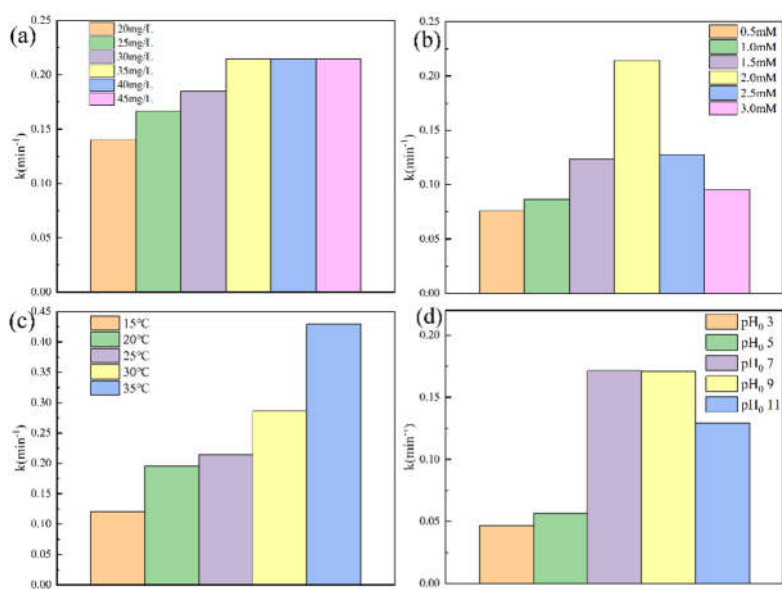

**Figure S2.** The  $K_{obs}$  under the reaction conditions of different (a) catalyst dosage, (b) PMS concentration, (c) reaction temperature, and (d) initial pH values on the removal efficiency of CQP. (Experiment conditions:  $[[\text{CQP}]_0 = 10 \text{ mg/L}$ ,  $[\text{catalyst}] = 35 \text{ mg/L}$ ,  $[\text{PMS}] = 2.0 \text{ mM}$ , initial  $\text{pH} = 6.5 \pm 0.3$ ,  $T = 25^\circ\text{C}$ ).

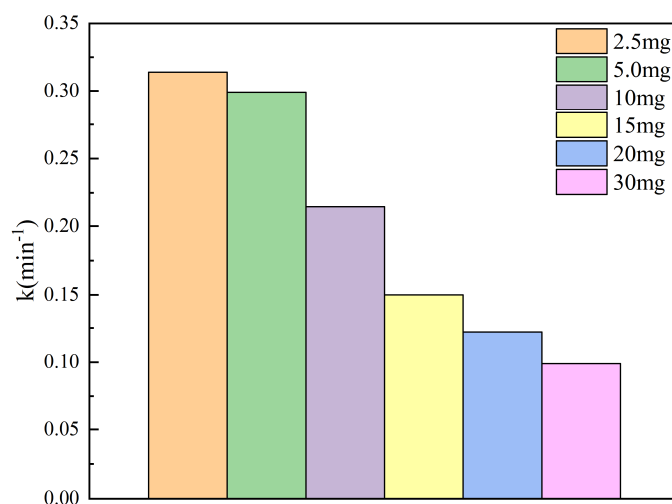

**Figure S3.**  $K_{obs}$  at various initial CQP concentrations. (Experiment conditions: [catalyst]= 35 mg/L, [PMS] = 2.0 mM, initial pH =  $6.5 \pm 0.3$ , T = 25°C)

**Table S1.** Comparison of the reaction parameters with previously reported catalysts for PMS activation.

| catalyst                               | Pollutant  | Degradation conditions           | Removal efficiency | Reference |
|----------------------------------------|------------|----------------------------------|--------------------|-----------|
| CoFe <sub>2</sub> O <sub>4</sub> @CNTs | 10mg/L CQP | catalyst = 35 mg/L, PMS = 2.0mM  | 98.7% in 20 min    | This work |
| CMO                                    | 5mg/L CQP  | catalyst = 100 mg/L, PMS = 0.2mM | 99.9% in 20 min    | 1         |
| SA Co-N-C(30)                          | 10mg/L CQP | catalyst = 150 mg/L, PMS = 1.0mM | 98% in 30 min      | 2         |

**Table S2.** Concentration of key elements in leaching solution by ICP-OES.

| element | Content in sample( $\mu\text{g/L}$ ) | element | Content in sample( $\mu\text{g/L}$ ) |
|---------|--------------------------------------|---------|--------------------------------------|
| Co      | 27672400.0                           | Li      | 3248400.0                            |
| S       | 76364000.0                           | Al      | 297524.0                             |
| Fe      | 1261.1                               | Ni      | 53247.0                              |
| Na      | 26244.3                              | Mg      | 135845.0                             |
| Mn      | 29531.5                              | Si      | 37488.1                              |

## References

1. Dan, J.; Rao, P.; Wang, Q.; Zhang, M.; He, Z.; Zhang, W.; Gao, N.; Deng, J.; Chen, J., Catalytic performance of wrapped CoO by MgO in oxidative degradation of chloroquine phosphate with peroxymonosulfate. *Applied Surface Science* **2022**, 573, 151430.
2. Peng, X.; Wu, J.; Zhao, Z.; Wang, X.; Dai, H.; Wei, Y.; Xu, G.; Hu, F., Activation of peroxymonosulfate by single atom Co-N-C catalysts for high-efficient removal of chloroquine phosphate via non-radical pathways: Electron-transfer mechanism. *Chemical Engineering Journal* **2022**, 429, 132245.
